# Supplementary material for: Synthesis and antioxidant activity of DOPA peptidomimetics by a novel IBX mediated aromatic oxidative functionalization
Source: Royal Society of Chemistry journal article supplement (doi:10.1039/c5ra09464j), 2015-01-01

## Synthesis and antioxidant activity of DOPA peptidomimetics by a novel IBX mediated aromatic oxidative functionalization

Bruno Mattia Bizzarri<sup>a</sup>, Cristina Pieri<sup>a</sup>, Giorgia Botta<sup>a</sup>, Pasquale Mosesso<sup>a</sup>, Serena Cinelli<sup>b</sup>, Angelo Schinoppi<sup>a</sup> and Raffele Saladino\*

Supporting Materials S1#. <sup>1</sup>H-NMR and <sup>13</sup>C spectra of asynthesized compounds.

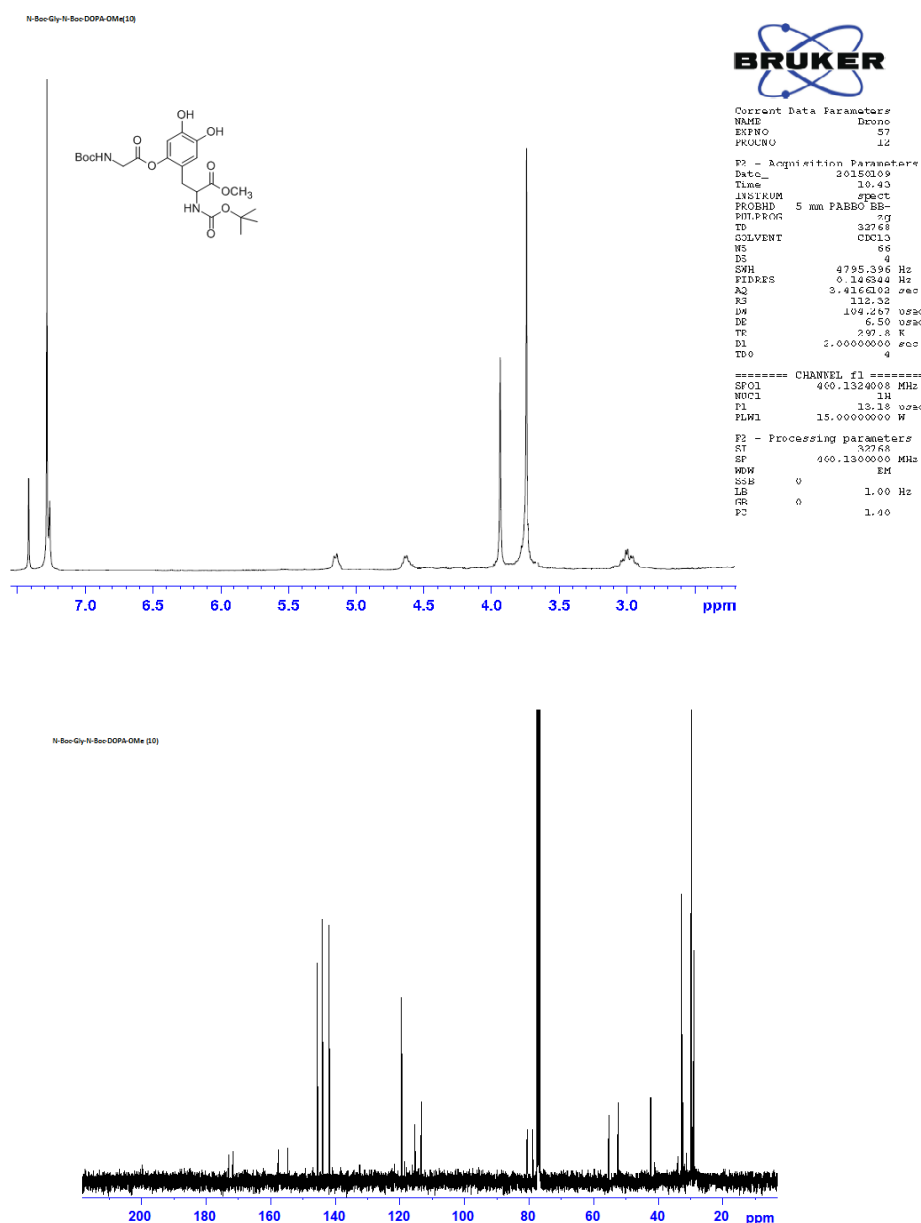

N-Boc-DOPA-OMe (11)

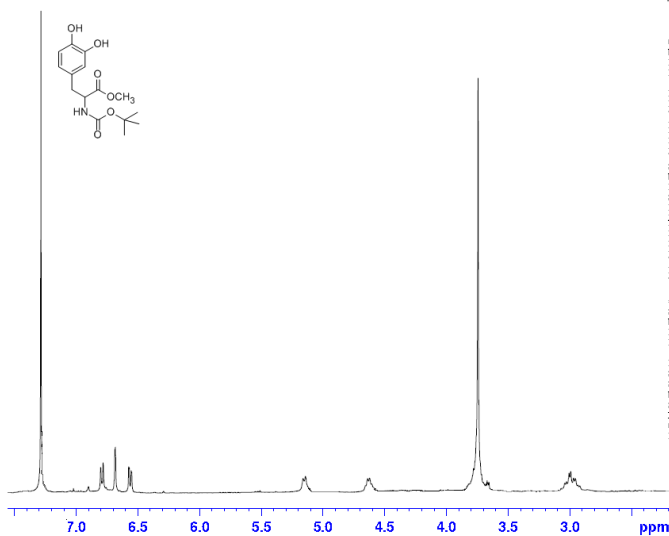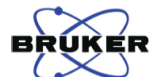

Current Data Parameters  
NAME Bruno  
EXPNO 58  
PROCNO 12

F2 - Acquisition Parameters  
Date\_ 20150109  
Time 10.43  
INSTRUM spect  
PROBHD 5 mm PABBO BB-  
PULPROG zg  
TD 32768  
SOLVENT CDCl<sub>3</sub>  
NS 66  
DS 4  
SWH 4795.396 Hz  
FIDRES 0.146344 Hz  
AQ 3.4166102 sec  
RG 112.32  
DM 104.267 usec  
DE 6.50 usec  
TE 297.8 K  
D1 2.00000000 sec  
TD0 4

===== CHANNEL f1 =====  
SFO1 400.1324008 MHz  
NUC1 1H  
P1 13.18 usec  
PLW1 15.00000000 W

F2 - Processing parameters  
SI 32768  
SF 400.1300000 MHz  
WDW EM  
SSB 0  
LB 1.00 Hz  
GB 0  
PC 1.40

N-Boc-DOPA-OMe (12)

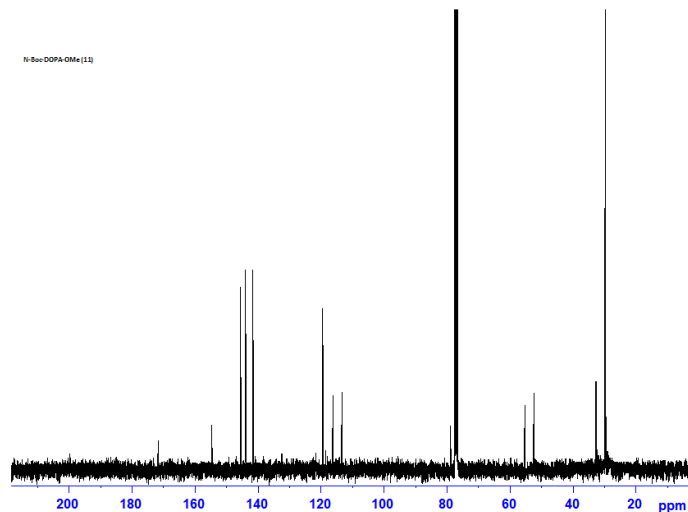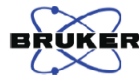

Current Data Parameters  
NAME Bruno  
EXPNO 68  
PROCNO 2

F2 - Acquisition Parameters  
Date\_ 20140710  
Time 11.11  
INSTRUM spect  
PROBHD 5 mm PABBO BB-  
PULPROG zg  
TD 32768  
SOLVENT CDCl<sub>3</sub>  
NS 38  
DS 6  
SWH 4795.396 Hz  
FIDRES 0.146344 Hz  
AQ 3.4166102 sec  
RG 112.32  
DM 104.267 usec  
DE 6.50 usec  
TE 294.8 K  
D1 2.00000000 sec  
TD0 6

===== CHANNEL f1 =====  
SFO1 400.1324008 MHz  
NUC1 1H  
P1 13.18 usec  
PLW1 15.00000000 W

F2 - Processing parameters  
SI 32768  
SF 400.1300000 MHz  
WDW EM  
SSB 0  
LB 1.00 Hz  
GB 0  
PC 1.40

N-Boc-Ala-N-Boc-DOPA-OMe (12)

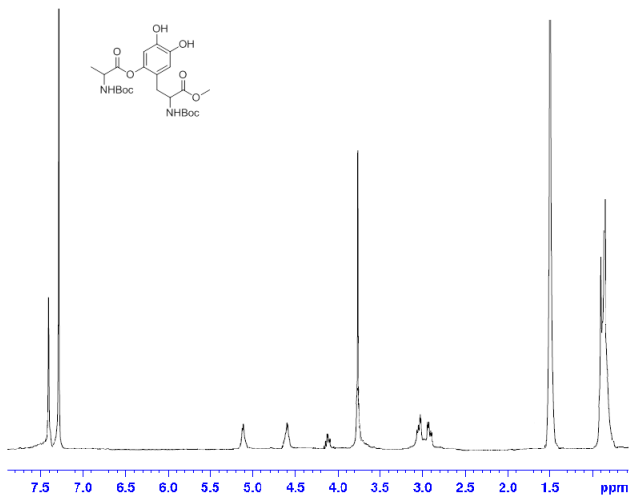

N-Boc-Ala-N-Boc-DOPA-OMe (12)

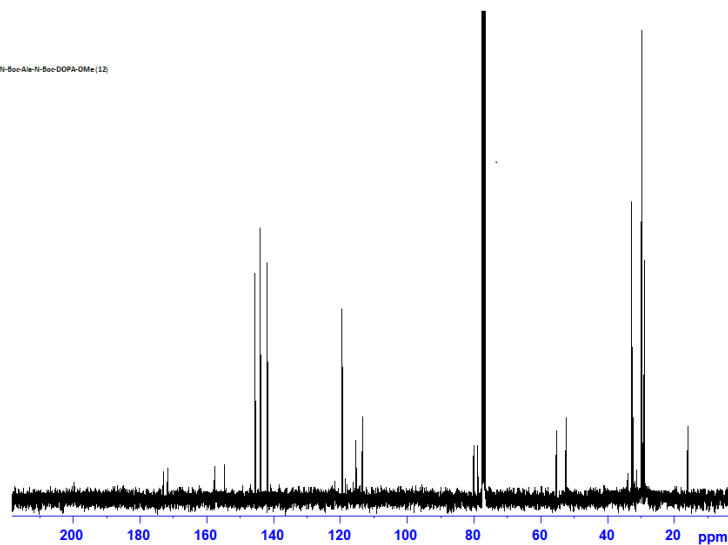

N-Boc-Val-N-Boc-DOPA-OMe (13)

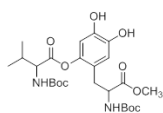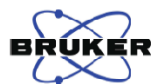

Current Data Parameters  
 NAME: 13cnc  
 EXPNO: 43  
 PROCNO: 2  
 F2 - Acquisition Parameters  
 Date\_: 20140710  
 Time: 11.15  
 INSTRUM: spect  
 F2PROB: 5 mm PAEBB-ES-  
 PULPROG: zg  
 TD: 2768  
 SOLVENT: CDCl3  
 NS: 38  
 DS: 4  
 SWH: 4795.398 Hz  
 FIDRES: 0.146344 Hz  
 AQ: 3.416302 sec  
 RG: 52.47  
 DW: 104.267 usec  
 D2: 6.50 usec  
 T2: 294.8 Hz  
 D1: 2.0000000 sec  
 T20: 6  
 ===== CHANNEL f1 =====  
 NUC1: 13C  
 P1: 13.18 usec  
 PL1: 15.0000000 W  
 F2 - Processing parameters  
 SI: 32768  
 SF: 400.1360000 MHz  
 WDM: EK  
 SSB: 0  
 LB: 1.00 Hz  
 GB: 0  
 PC: 1.40

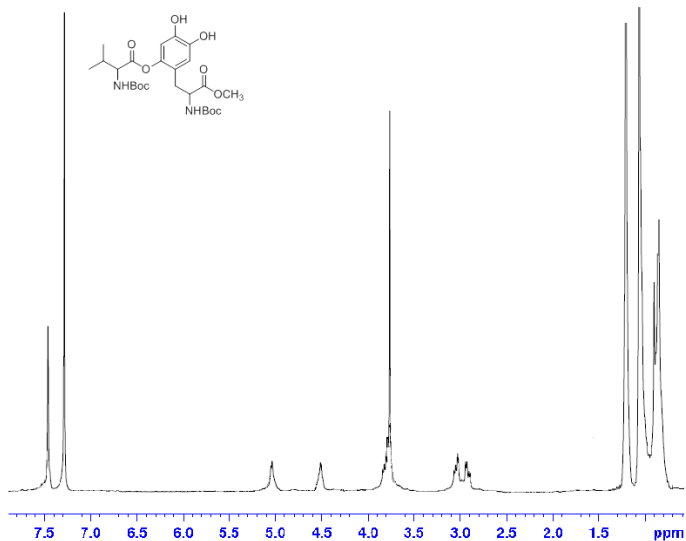

N-Boc-Val-N-Boc-DOPA-OMe (13)

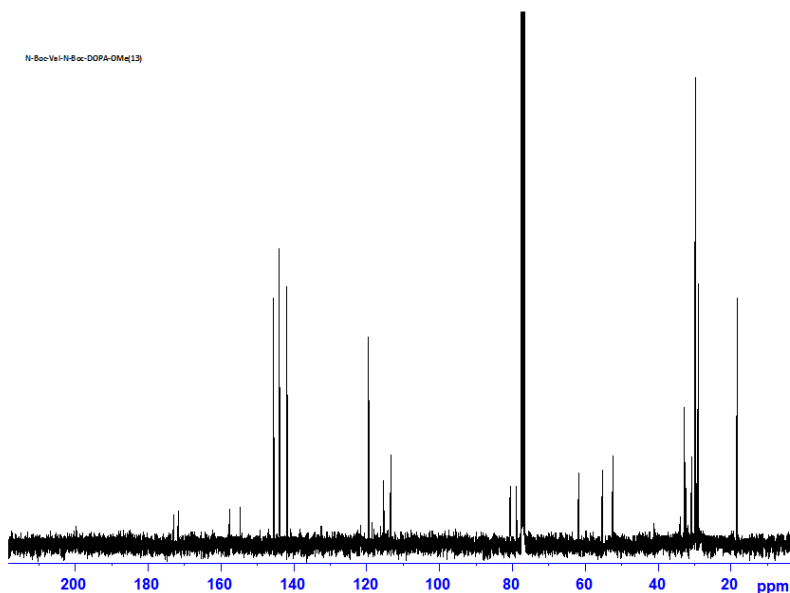

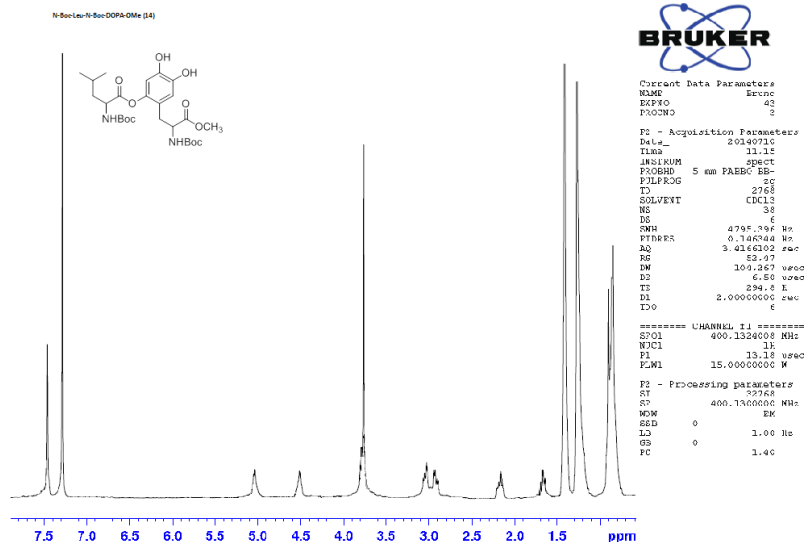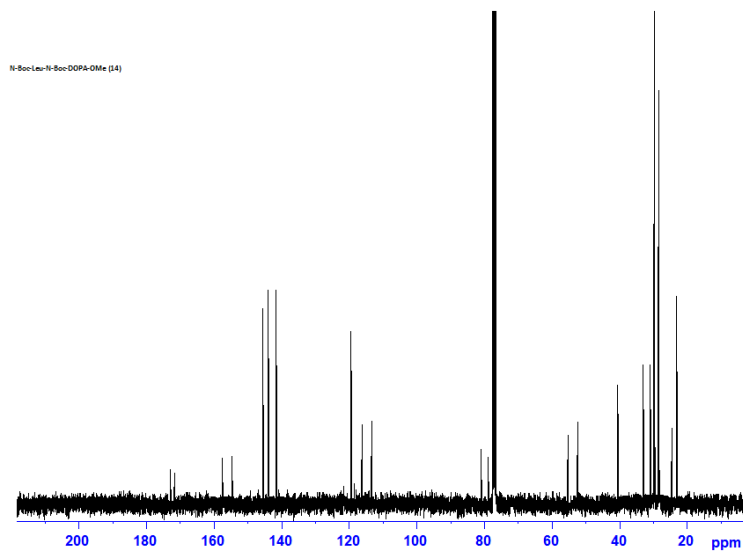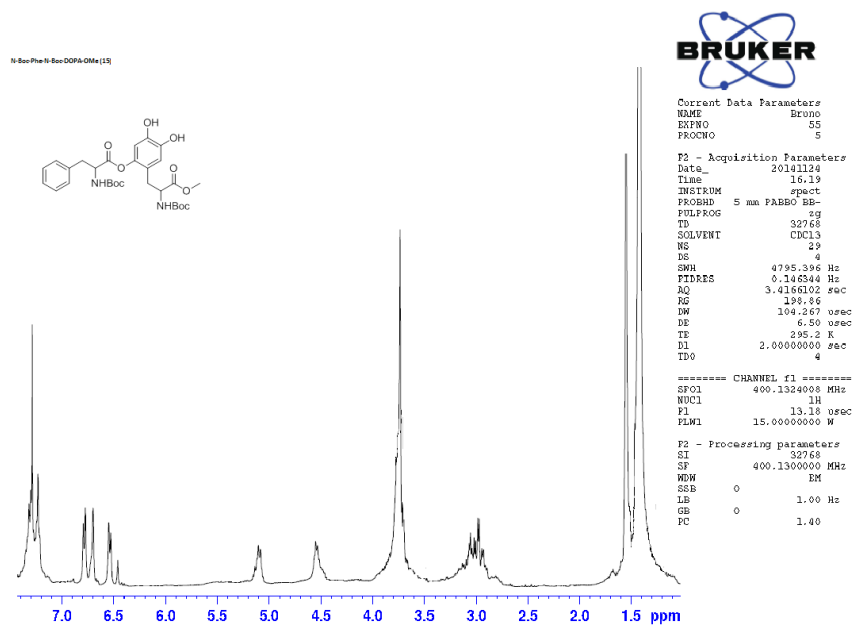

N-Boc-Pro-N-Boc-DOPA-OMe [15]

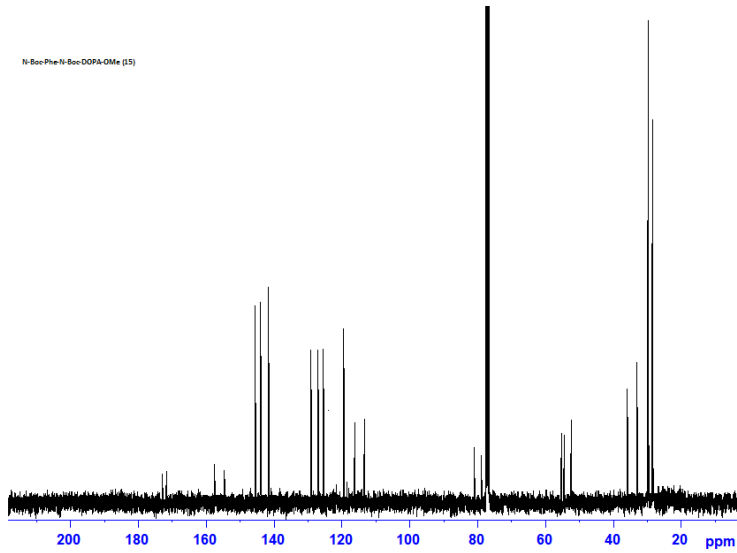

N-Boc-Pro-N-Boc-DOPA-OMe [16]

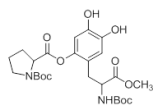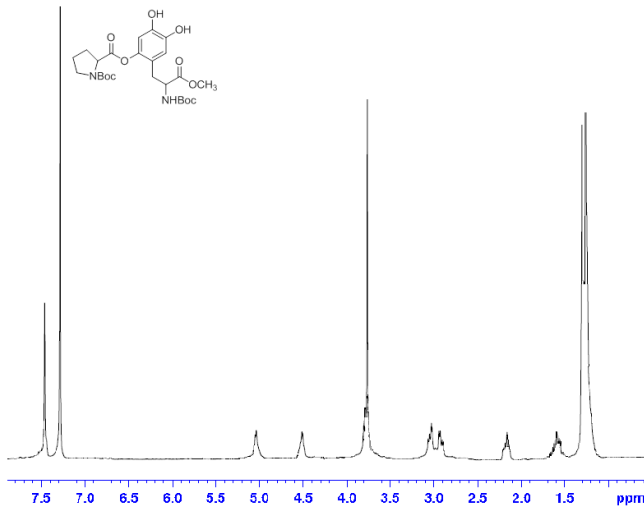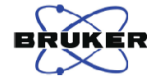

Current Data Parameters  
NAME Bruker  
EXPNO 71  
PROCNO 2

F2 - Acquisition Parameters  
Date\_ 0140710  
Time 11.11  
INSTRUM spect  
PROBHD 5 mm PAEBB EB-  
PULPROG zgpg  
TD 2768  
SOLVENT CDCl3  
NS 38  
DS 6  
FIDRES 4785.104 Hz  
FIDRES 0.746244 Hz  
AQ 3.416202 sec  
RG 63.07  
DM 109.267 usec  
D2 5.50 usec  
T2 294.8 s  
D1 2.0000000 sec  
DO 6

===== CHANNEL f1 =====  
SFO1 400.1324000 MHz  
NUC1 13  
P1 13.18 usec  
F1W1 15.0000000 W

F2 - Processing parameters  
SI 32768  
SF 400.1324000 MHz  
WDW EM  
SSB 0  
LB 1.00 Hz  
GB 0  
PC 1.40

N-Boc-Pro-N-Boc-DOPA-OMe [16]

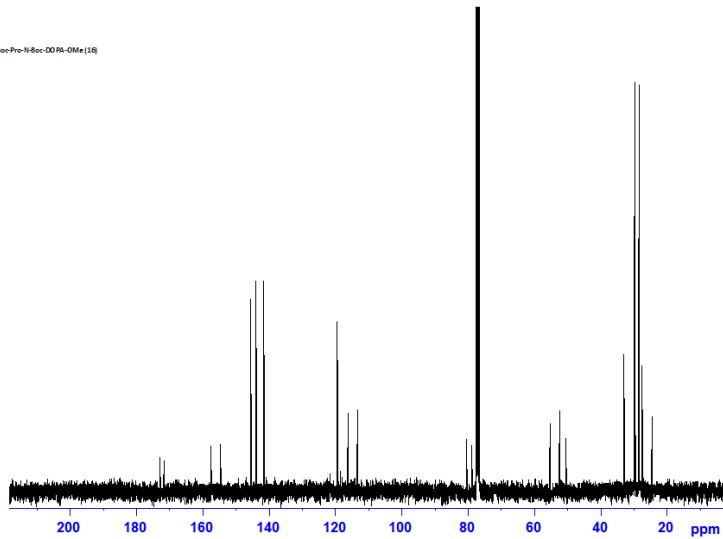

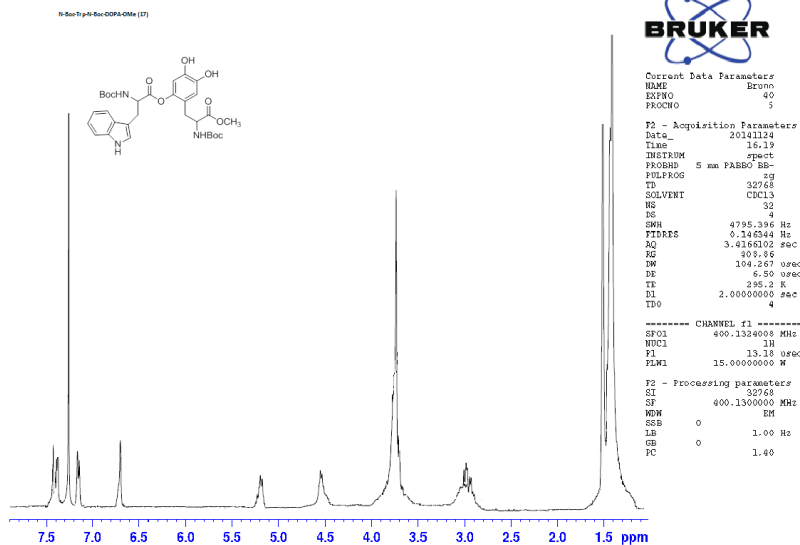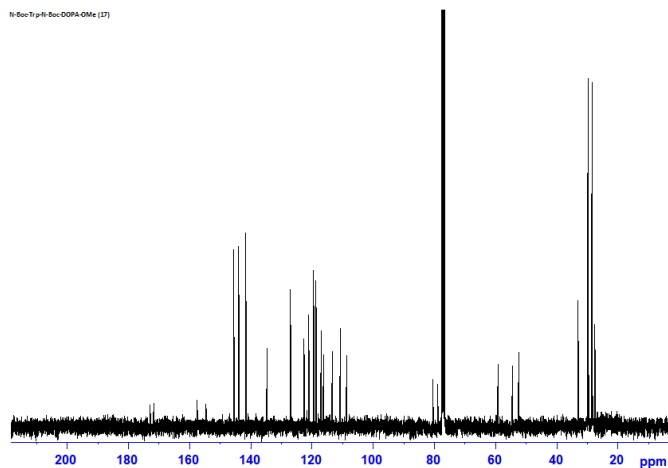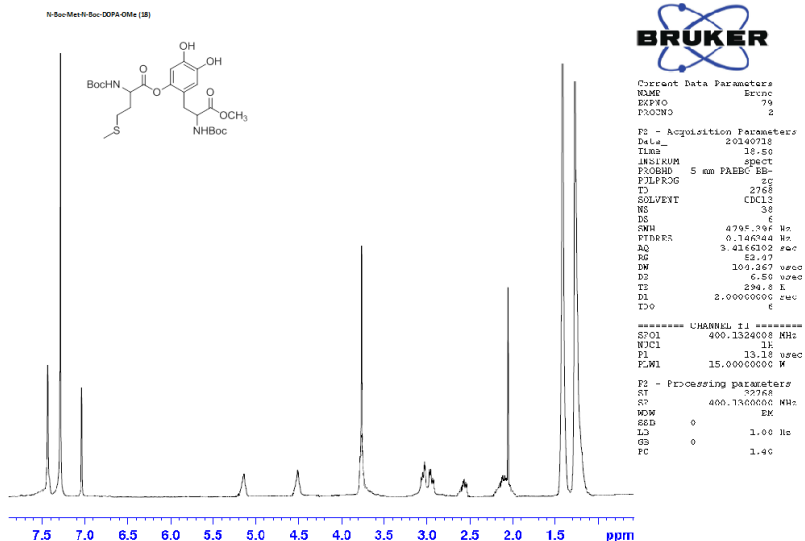

N-Boc-Met-N-Boc-DOPA-OMe (18)

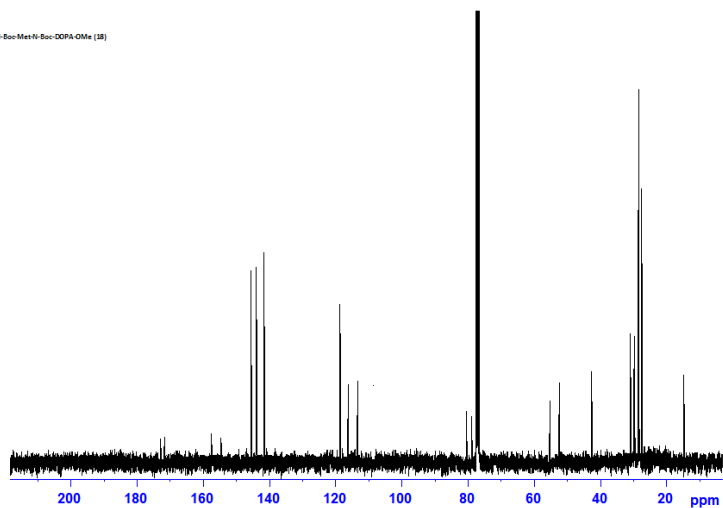

Gly-N-Boc-DOPA-OMe (27)

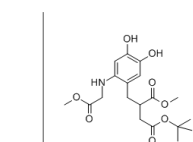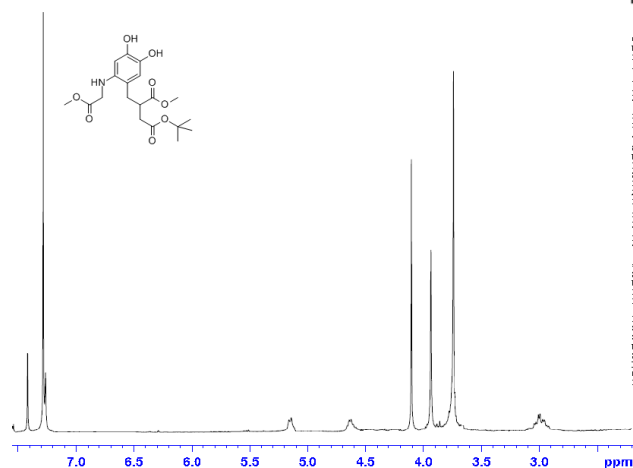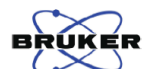

Current Data Parameters  
NAME Dromo  
EXPNO 95  
PROCNO 12  
F2 - Acquisition Parameters  
Date\_ 20150309  
Time 15.43  
INSTRUM spect  
PROBHD 5 mm PABBO ES-  
PMT.PRG 7g  
TD 32768  
SOLVENT CHCL3  
NS 66  
DS 4  
SWH 4795.396 Hz  
FIDRES 0.146346 Hz  
AQ 3.4166102 sec  
RG 112.32  
DA 104.267 uspc  
DE 6.50 uspc  
TE 297.8 K  
D1 2.00000000 sec  
TD0 4  
===== CHANNEL f1 =====  
SFO1 400.1324008 MHz  
NUC1 1H  
P1 13.18 uspc  
PLM1 15.00000000 W  
F2 - Processing parameters  
CT 32768  
SF 400.1300000 MHz  
MW EM  
SSB 0  
LB 1.00 Hz  
GB 0  
PC 1.00

Gly-N-Boc-DOPA-OMe (27)

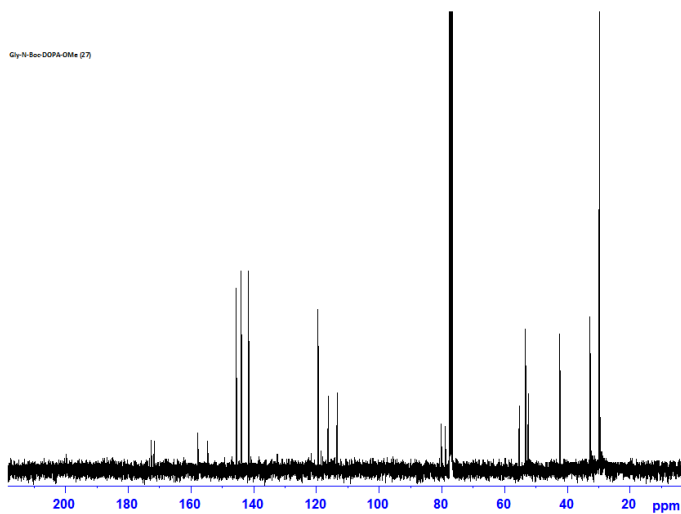

As-H8ac-DORs-OMe (28)

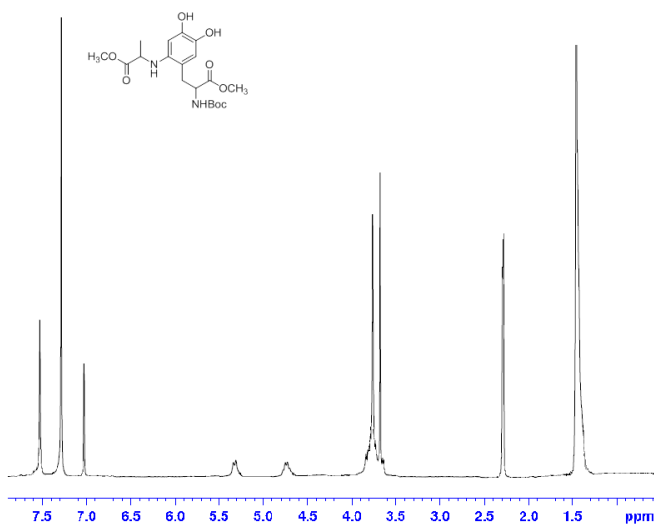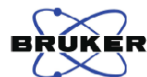

Current Data Parameters  
NAME: As-H8ac-DORs-OMe  
EXPNO: 66  
PROCNO: 11

F2 - Acquisition Parameters  
Date\_: 20140710  
Time: 14.12  
INSTRUM: spect  
PROBHD: 5 mm PABBO BB-  
PULPROG: zgpg30  
TD: 32768  
SOLVENT: CDCl3  
NS: 38  
DS: 6  
SWH: 4795.596 Hz  
FIDRES: 0.146344 Hz  
AQ: 3.416302 sec  
RG: 63.97  
DM: 109.267 usec  
D2: 6.50 usec  
TE: 294.2 K  
D1: 2.00000000 sec  
D10: 6

===== CHANNEL f1 =====  
SFO1: 400.1324008 MHz  
NUC1: 1H  
P1: 13.18 usec  
PL1: 15.0000000 W

F2 - Processing parameters  
SI: 32768  
SF: 400.1324008 MHz  
WDW: EM  
SSB: 0  
LB: 1.00 Hz  
GB: 0  
PC: 1.40

As-H8ac-DORs-OMe (28)

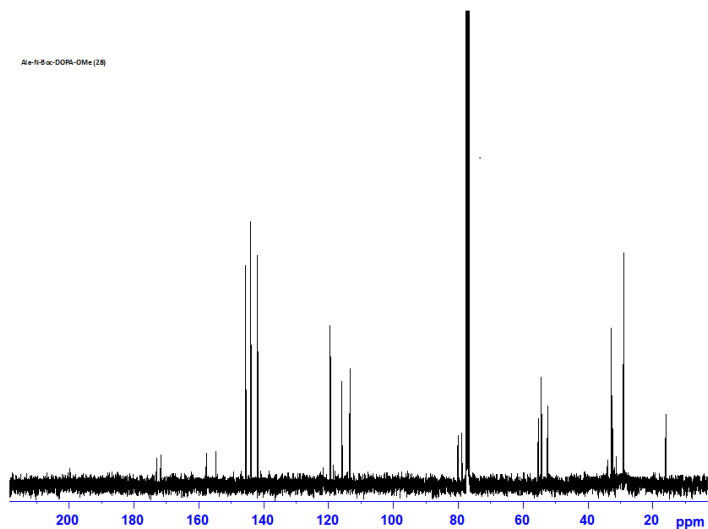

As-H8ac-DORs-OMe (28)

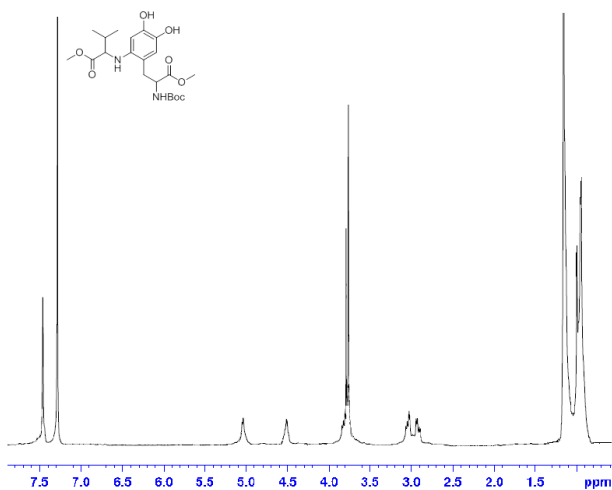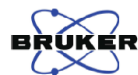

Current Data Parameters  
NAME: As-H8ac-DORs-OMe  
EXPNO: 48  
PROCNO: 2

F2 - Acquisition Parameters  
Date\_: 20140710  
Time: 11.12  
INSTRUM: spect  
PROBHD: 5 mm PABBO BB-  
PULPROG: zgpg30  
TD: 32768  
SOLVENT: CDCl3  
NS: 38  
DS: 6  
SWH: 4795.596 Hz  
FIDRES: 0.146344 Hz  
AQ: 3.416302 sec  
RG: 63.97  
DM: 109.267 usec  
D2: 6.50 usec  
TE: 294.2 K  
D1: 2.00000000 sec  
D10: 6

===== CHANNEL f1 =====  
SFO1: 400.1324008 MHz  
NUC1: 1H  
P1: 13.18 usec  
PL1: 15.0000000 W

F2 - Processing parameters  
SI: 32768  
SF: 400.1324008 MHz  
WDW: EM  
SSB: 0  
LB: 1.00 Hz  
GB: 0  
PC: 1.40

Val-N-Boc-DOPA-OMe (28)

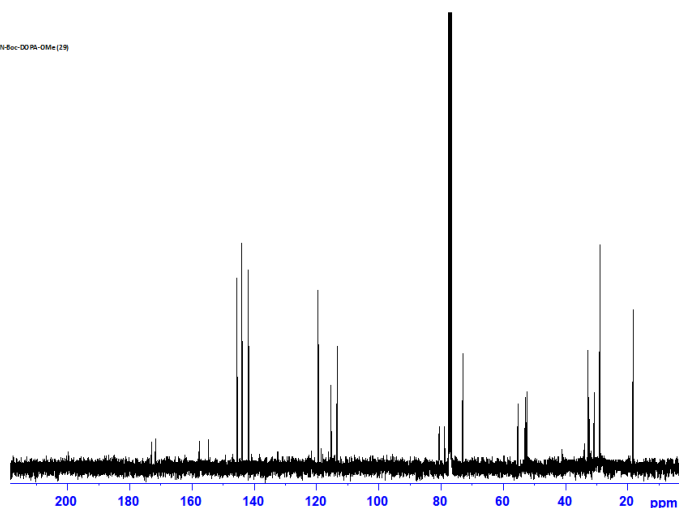

Leu-N-Boc-DOPA-OMe (30)

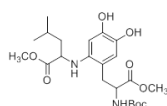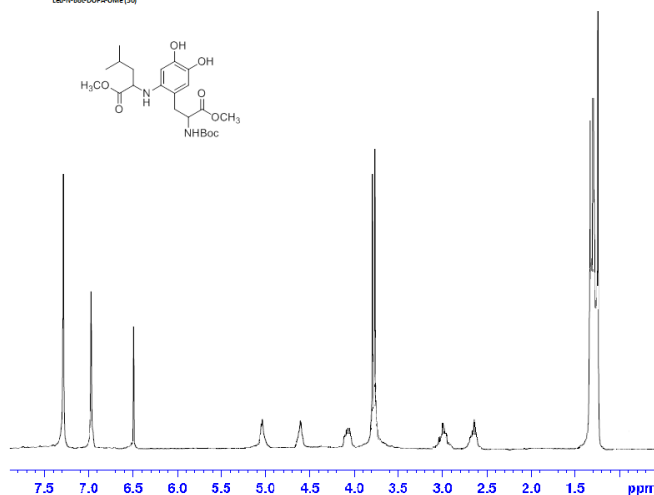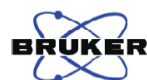

Current Data Parameters  
NAME: 46  
EXPNO: 2  
PROCNO: 2  
P2 - Acquisition Parameters  
Date\_: 20140718  
Time: 13.18  
INSTRUM: spect  
PROBHD: 5 mm PAEBB-EB-  
PULPROG: zg  
TD: 2768  
SOLVENT: CDCl3  
NS: 36  
DS: 6  
SWH: 4795.396 Hz  
FIDRES: 0.146240 Hz  
AQ: 3.4166202 sec  
RG: 52.07  
DM: 104.2567 usec  
D2: 6.50 usec  
TE: 294.0 K  
D1: 2.0000000 sec  
TDO: 0  
===== CHANNEL f1 =====  
SFO1: 400.1324008 MHz  
NUC1: 15  
P1: 13.18 usec  
PLW1: 15.0000000 W  
P2 - Processing parameters  
ST: 32768  
SF: 400.1300000 MHz  
WDW: EM  
SSB: 0  
LB: 1.00 Hz  
GB: 0  
PC: 1.40

Leu-N-Boc-DOPA-OMe (30)

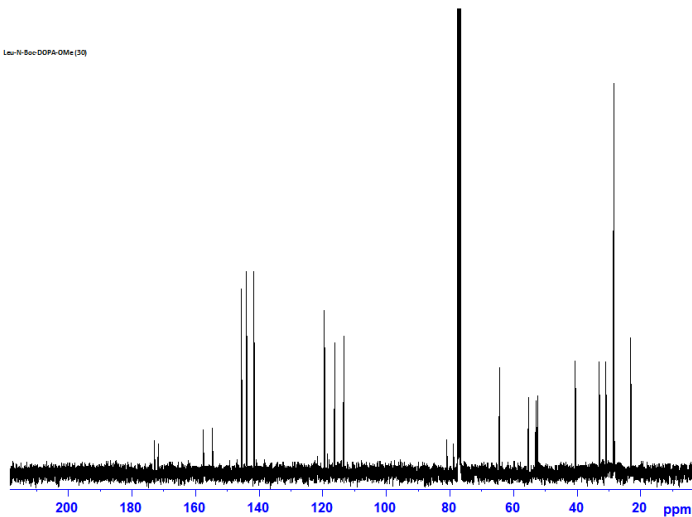

COC(=O)C(NC(Cc1ccccc1)C(=O)OC)Cc2cc(O)c(O)cc2C(=O)NCC(=O)OC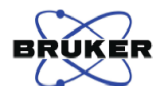

```

Current Data Parameters
NAME                Bruno
EXPNO                4
PROCNO              45

F2 - Acquisition Parameters
Data                20141129
Time                12.12
INSTRUM             spect
PROBHD              5 mm PABBO-BB
PULPROG             zgpg
TD                  32768
SOLVENT             CDCl3
NS                   97
DS                   4
SWH                  4795.396 Hz
FIDRES              0.165494 Hz
AQ                  3.4165102 sec
RG                  198.96
DE                  104.267 usec
TE                  305.2 K
D1                  2.00000000 sec
T0                  4

===== CHANNEL f1 =====
SPOL1               400.1324000 MHz
NUC1                 1H
P1                   13.16 usec
PLWL1               15.00000000 W

F1 - Processing parameters
SI                   32768
SF                   400.1300000 MHz
RGW                 1600
LB                   1.00 Hz
GB                   0
PC                   0
LC                   0
  
```

Phc-N-Soc-DOPs-OMe (31)

The <sup>13</sup>C NMR spectrum shows chemical shifts from 20 to 200 ppm. The x-axis is labeled 'ppm' and has major ticks at 200, 180, 160, 140, 120, 100, 80, 60, 40, and 20. The spectrum features a very tall, sharp peak at approximately 75 ppm, which is the solvent peak for CDCl<sub>3</sub>. Other significant peaks are observed at approximately 145 ppm (a doublet), 135 ppm (a doublet), 125 ppm (a doublet), 115 ppm (a doublet), 105 ppm (a doublet), 65 ppm (a doublet), 55 ppm (a doublet), 35 ppm (a doublet), and 25 ppm (a doublet). The baseline is relatively flat with some minor noise.

COC(=O)C1CCC1N(c2cc(O)c(O)cc2CC(=O)NCC(=O)OC)C3CCCC3C(=O)OC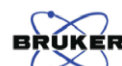

```

Current Data Parameters
NAME      Bruno
EXPNO     18
PROCNO    1

P2 - Acquisition Parameters
Date_     20121213
Time      16:50
INSTRUM    spect
PROBHD     5 mm PABBO BB-
PULPROG    zgpg30
TD          32768
SOLVENT    DMSO
NS          42
DS          2
SWH          4795.394 Hz
FIDRES      0.1663444 Hz
AQ          3.4126502 sec
RG          329.86
DM          104.267 usec
DE          6.50 usec
TE          295.2 K
DQ          2.005000000 sec
TD0         4

===== CHANNEL f2 =====
SF01       400.1324000 MHz
NUC1        13C
P1          13.18 usec
PLW1        15.00000000 usec

P3 - Processing parameters
SI          32768
SF          400.1324000 MHz
GB          0
WDW          EM
SSB          0
LB          0.100 Hz
GB          0
PC          1.40

```

Pro-H-Boc-DOPA-OMe (32)

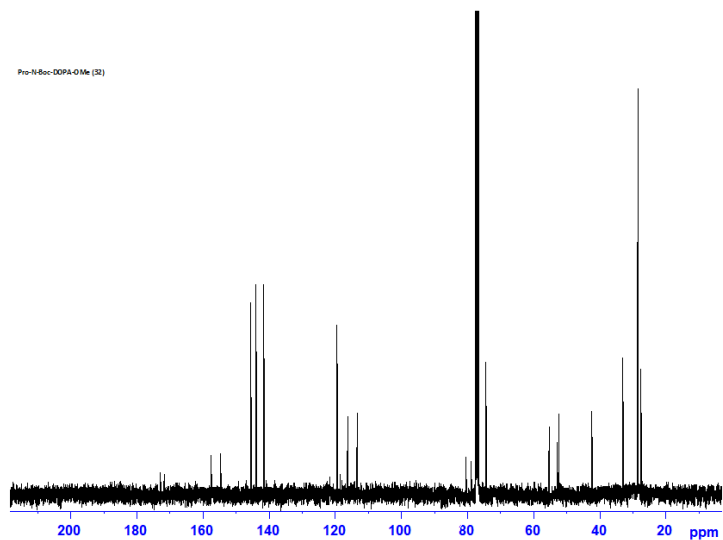

Trp-H-Boc-DOPA-OMe (33)

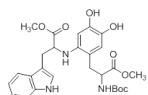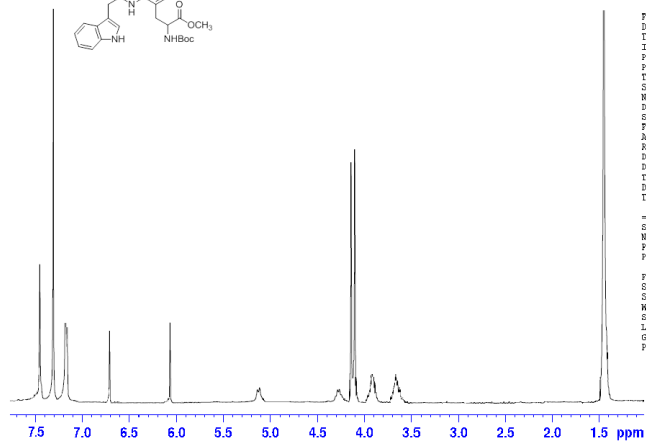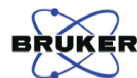

Current Data Parameters  
NAME Bruno  
EXPNO 98  
PROCNO 4

F2 - Acquisition Parameters  
Date\_ 20181124  
Time  
INSTRUM spect  
PROBHD 5 mm FASBO BB-  
PULPROG zg  
TD 32768  
SOLVENT CDCl3  
NS 22  
DS 4  
SWH 4795.396 Hz  
FIDRES 0.146544 Hz  
AQ 3.4156102 sec  
RG 138.86  
DM 104.267 usec  
DE 6.50 usec  
TE 295.2 K  
D1 2.0000000 sec  
TD0 4

===== CHANNEL f1 =====  
SFO1 400.1304000 MHz  
NUC1 1H  
P1 13.18 usec  
PLM1 15.0000000 W

F2 - Processing parameters  
SI 32768  
SF 400.1300000 MHz  
WDW EM  
SSB 0  
LB 1.00 Hz  
GB 0  
PC 1.40

Trp-H-Boc-DOPA-OMe (33)

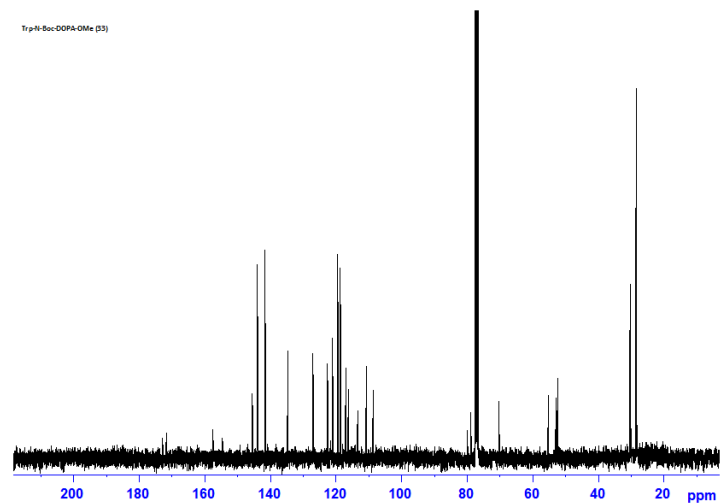

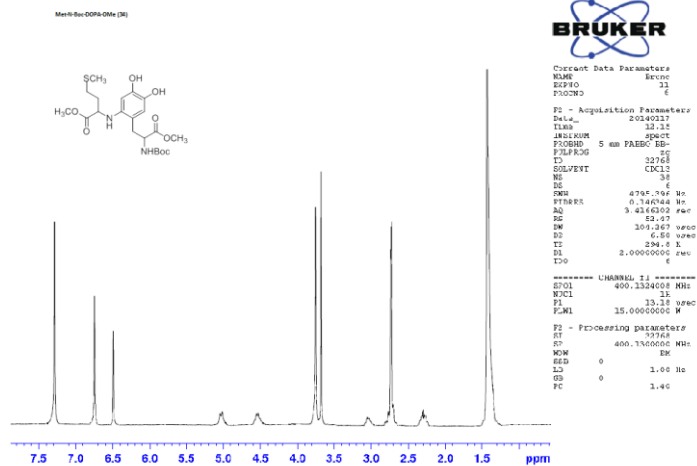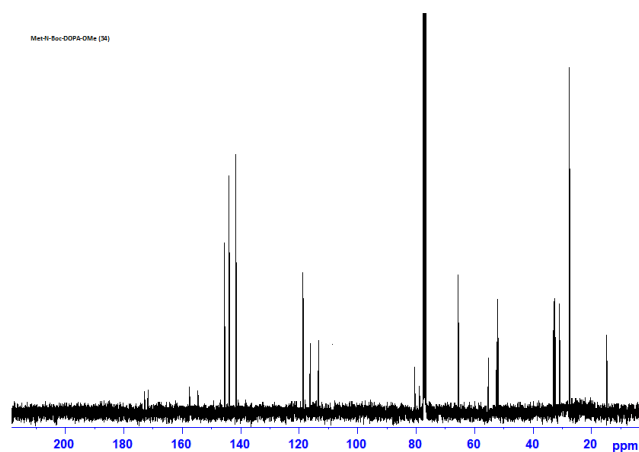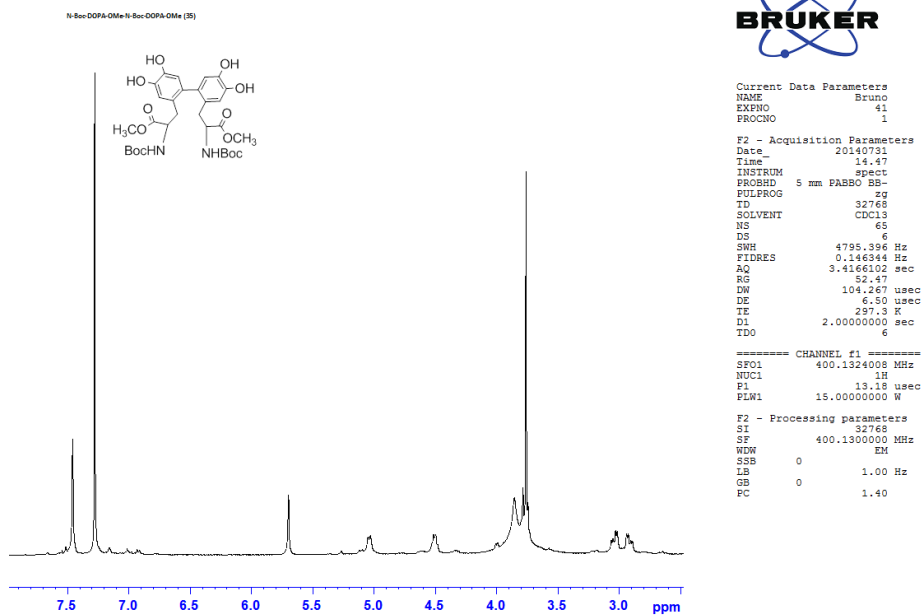

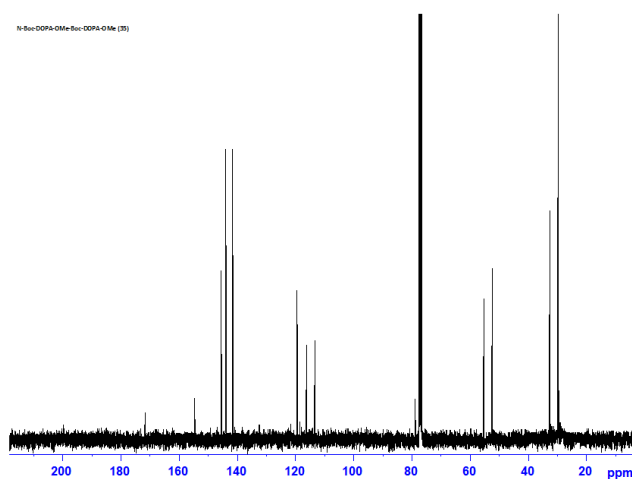

Supporting Materials S2#. Comet assay performed on cultures of mouse lymphoma L5178Y (TK<sup>+/−</sup>) cells

**Figure 1.** Comet assay performed on untreated cells (control PBS)

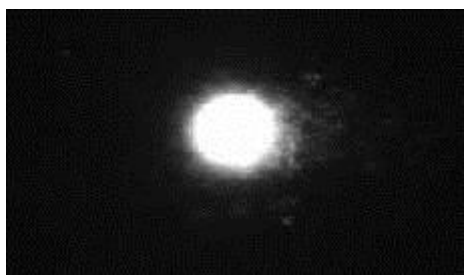

**Figure 2** Comet assay performed in presence of an aliquot of 50  $\mu$ l of H<sub>2</sub>O<sub>2</sub> (0.25  $\mu$ M).

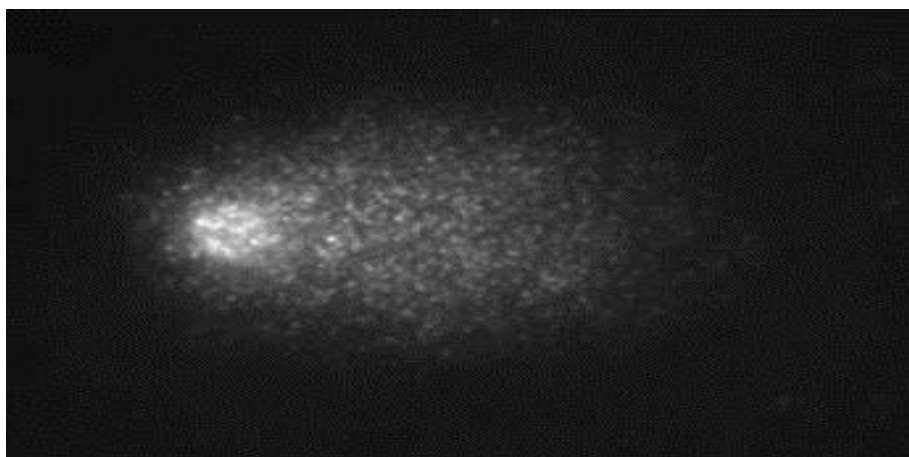

**Figure 3** Comet assay showing the efficacy of compound N-Boc-Gly-N-Boc-DOPA-OMe (**10**), against the extent of DNA breakage induced

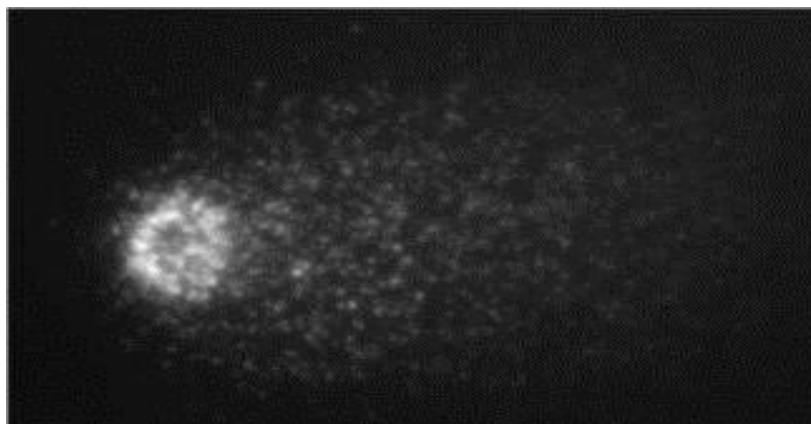

Supplement: c5ra09464j1.pdf [file c5ra09464j1.pdf]
